# Supplementary material for: Sc2(pydc)2 unit based 1D, 2D and 3D metal–organic frameworks as heterogeneous Lewis acid catalysts for cyanosilylation
Source: Royal Society of Chemistry journal article supplement (doi:10.1039/c4dt03221g), 2014-11-19
Supplement: c4dt03221g1.pdf [file c4dt03221g1.pdf]

# **Sc<sub>2</sub>(pydc)<sub>2</sub> Unit Based 1D, 2D and 3D Metal-Organic Frameworks as Heterogeneous Lewis Acid Catalysts for Cyanosilylation**

Yu Cao,<sup>a</sup> Ziqian Zhu,<sup>a</sup> Jianing Xu,<sup>a</sup> Li Wang,<sup>a</sup> Jiayin Sun\*,<sup>b</sup>  
Xiaobo Chen,<sup>c</sup> and Yong Fan\*,<sup>a</sup>

<sup>a</sup> *State Key Laboratory of Inorganic Synthesis and Preparative Chemistry, College of Chemistry, Jilin University, Changchun 130012, P. R. China*

<sup>b</sup> *School of Chemistry and Chemical Engineering, Anqing Normal University, Anqing Anhui 246011, P. R. China*

<sup>c</sup> *Department of Materials Engineering, Monash University, Clayton, VIC 3800, Australia*

*\*To whom correspondence should be addressed.*

*Professor Yong Fan  
College of Chemistry  
Jilin University  
Changchun 130012, P. R. China  
Fax: +86-431-85168439  
E-mail: mrfy@jlu.edu.cn*

*Professor Jiayin Sun  
School of Chemistry and Chemical Engineering  
Anqing Normal University  
Anhui 246011, P. R. China  
Fax: +86-556-5500690  
E-mail:*

*jiayin\_sun@163.com*

**Fig. S1** Powder X-ray diffraction patterns of the simulated and as-synthesized sample 1, indicating the phase purity of the as-synthesized sample. The green line shows the powder X-ray diffraction patterns of sample 1 after catalysis.

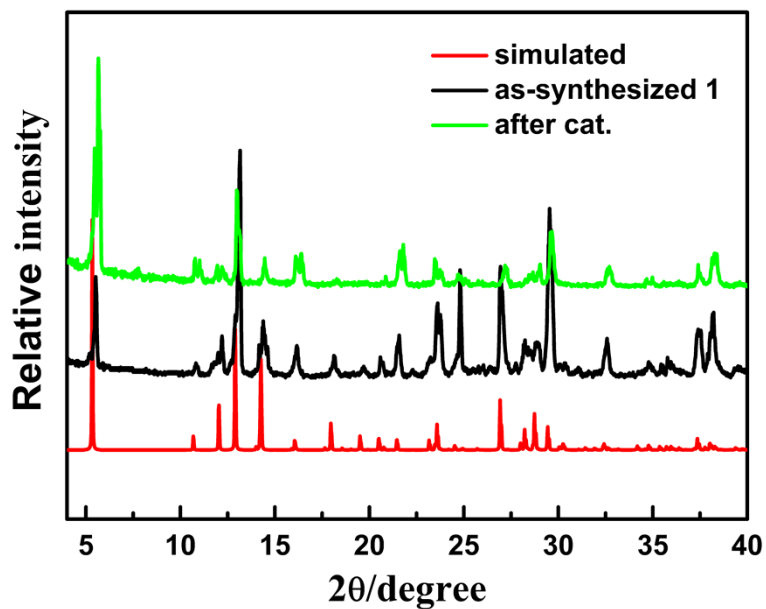

**Fig. S2** Powder X-ray diffraction patterns of the simulated and as synthesized sample 2, indicating the phase purity of the as-synthesized sample. The green line shows the powder X-ray diffraction patterns of sample 2 after fourth catalysis.

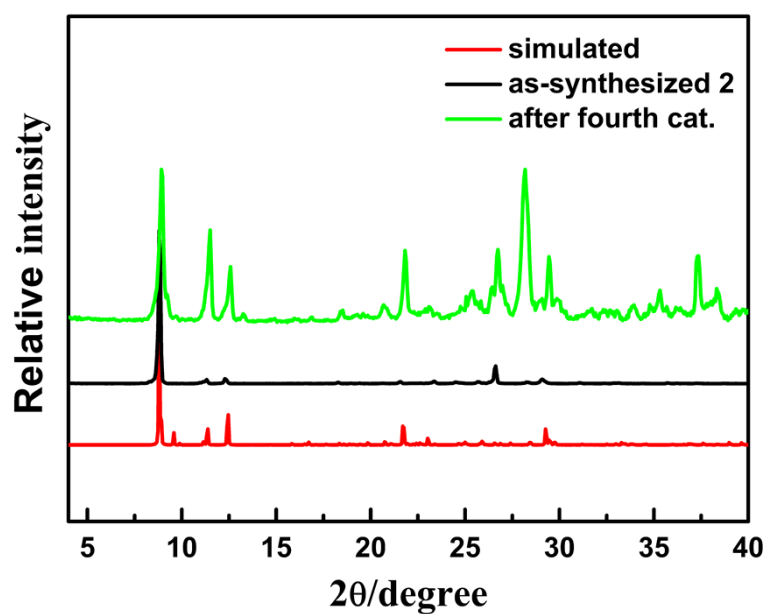

**Fig. S3** Powder X-ray diffraction patterns of the simulated and as synthesized sample **3**, indicating the phase purity of the as-synthesized sample. The blue line shows the powder X-ray diffraction patterns of sample **3** immersed in water at room temperature for 5 days and the green line shows the powder X-ray diffraction patterns of sample **3** after catalysis.

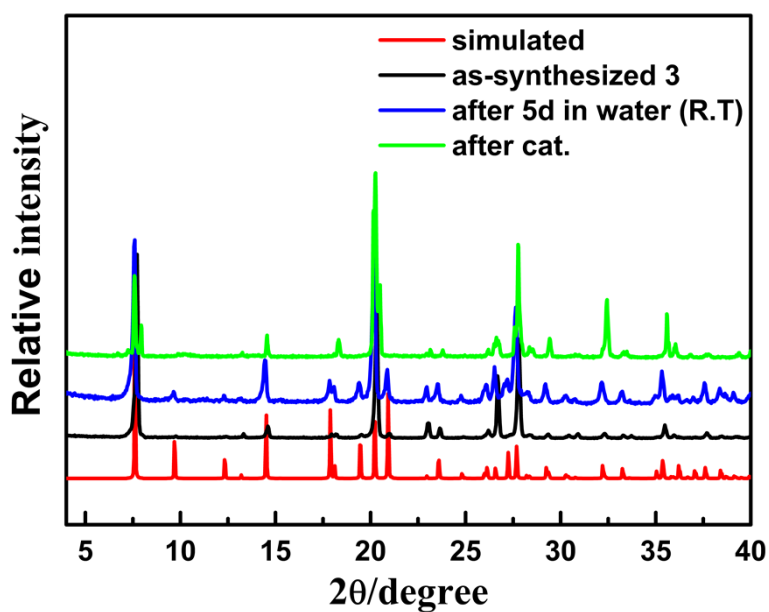

**Fig. S4** IR spectra for compound **1**, compound **2** and compound **3**.

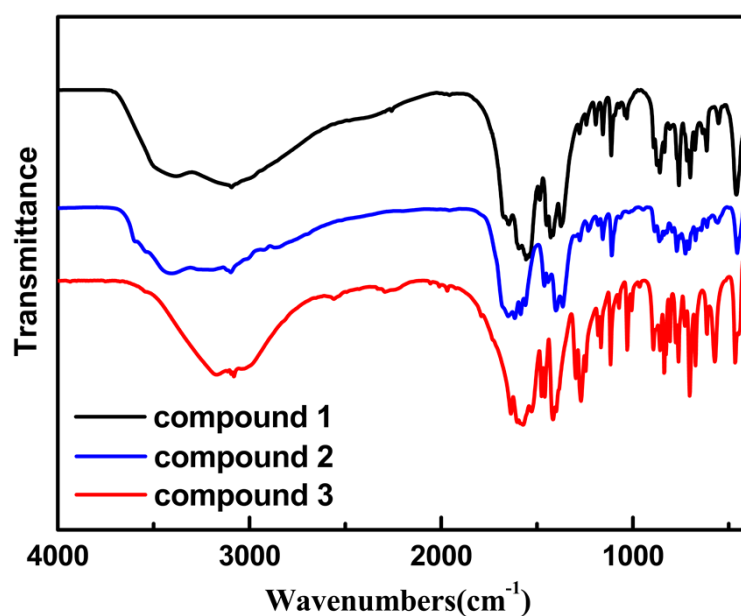

**Fig. S5** The coordination and geometry for Sc1 atom in compound 1.

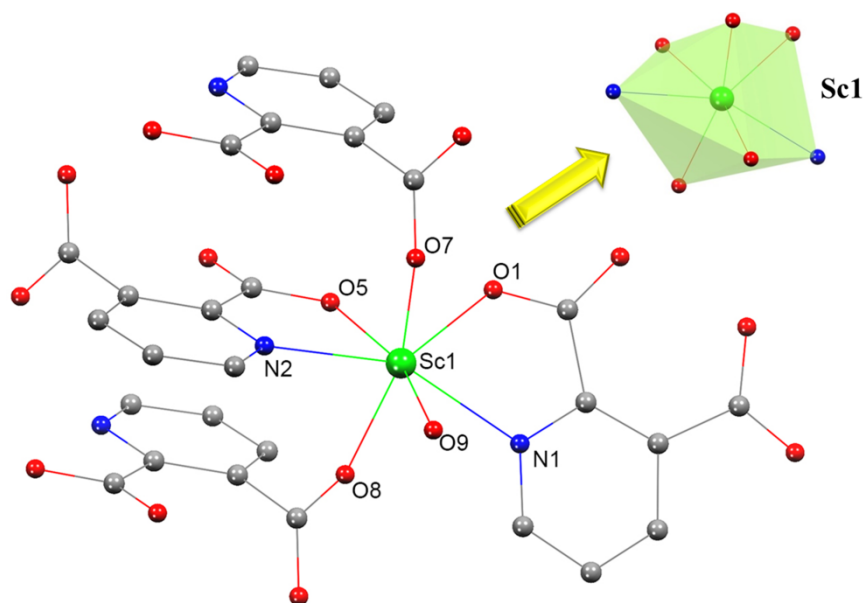

**Fig. S6** The coordination and geometry for Sc1, and Sc2 atoms in compound 2.

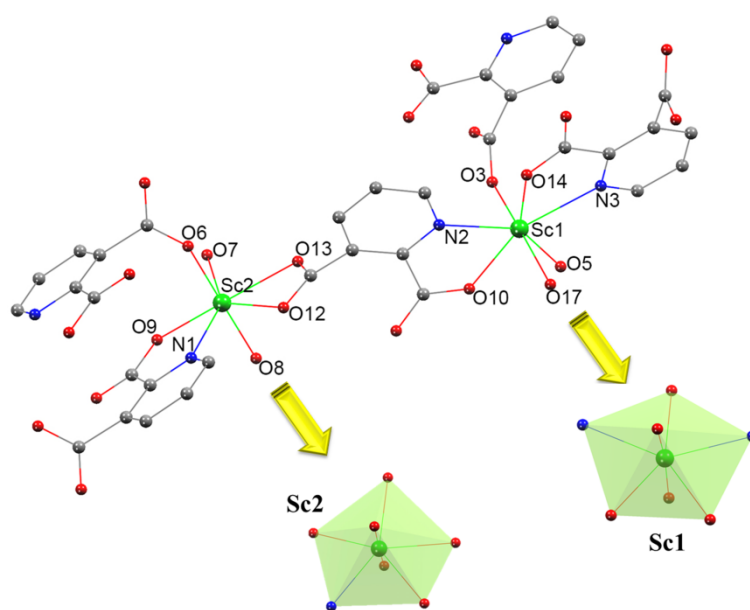

**Fig. S7** Hydrogen-bonding interaction between the S-shaped chains and waved-like chains along [100] direction of compound **2**;

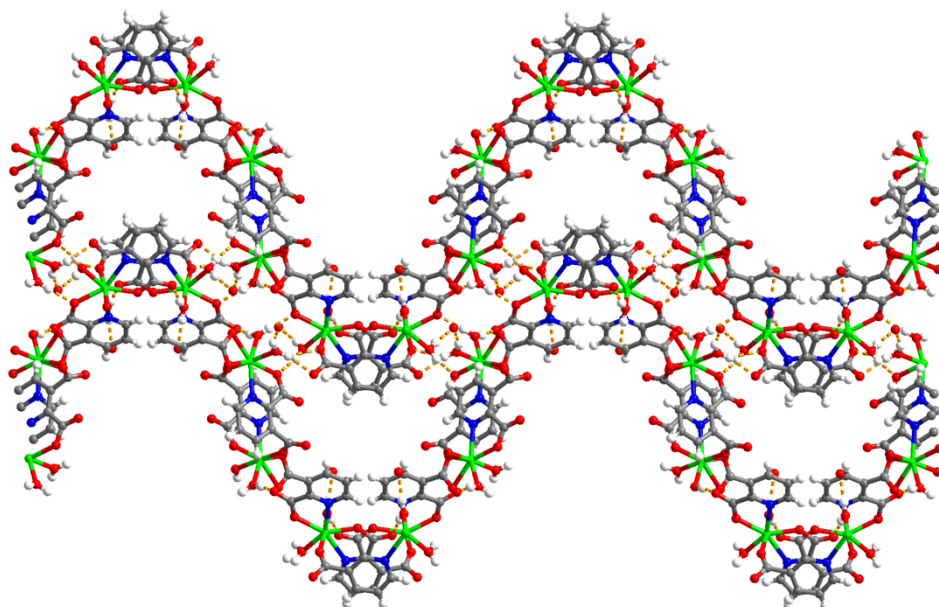

**Fig. S8** The coordination and geometry for Sc1 atom in compound **3**.

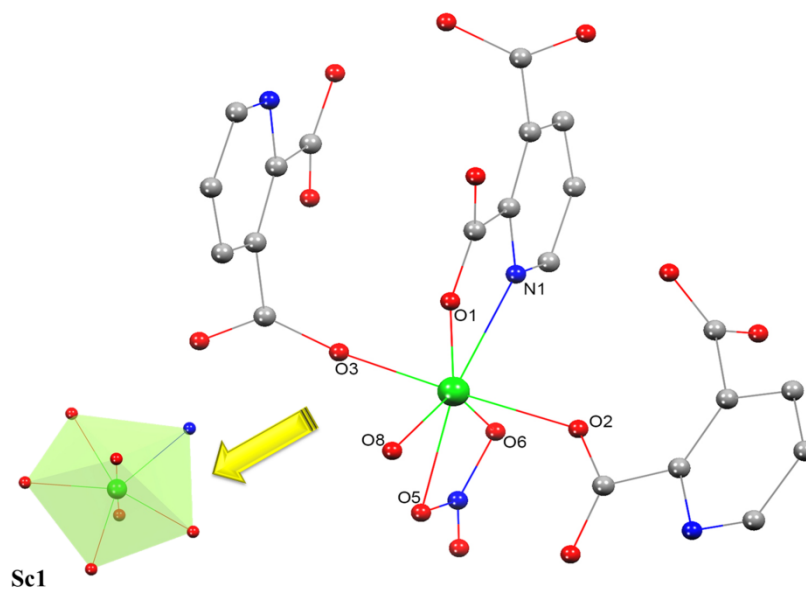

**Fig. S9** a) a schematic representation of the **nbo-a** net; b) Space-filling representations of compound **3** viewed along the *c* axes.

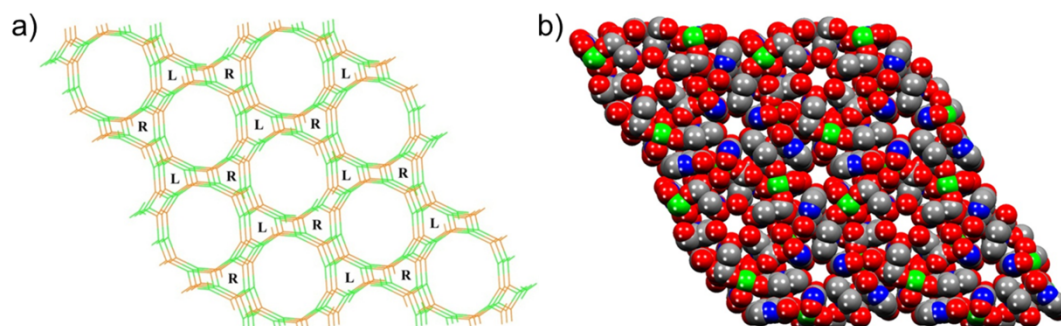

**Fig. S10** Coordination modes for the H<sub>2</sub>pydc ligand (I-V). Color scheme: carbon = gray, nitrogen = blue, oxygen = red, metal = green.

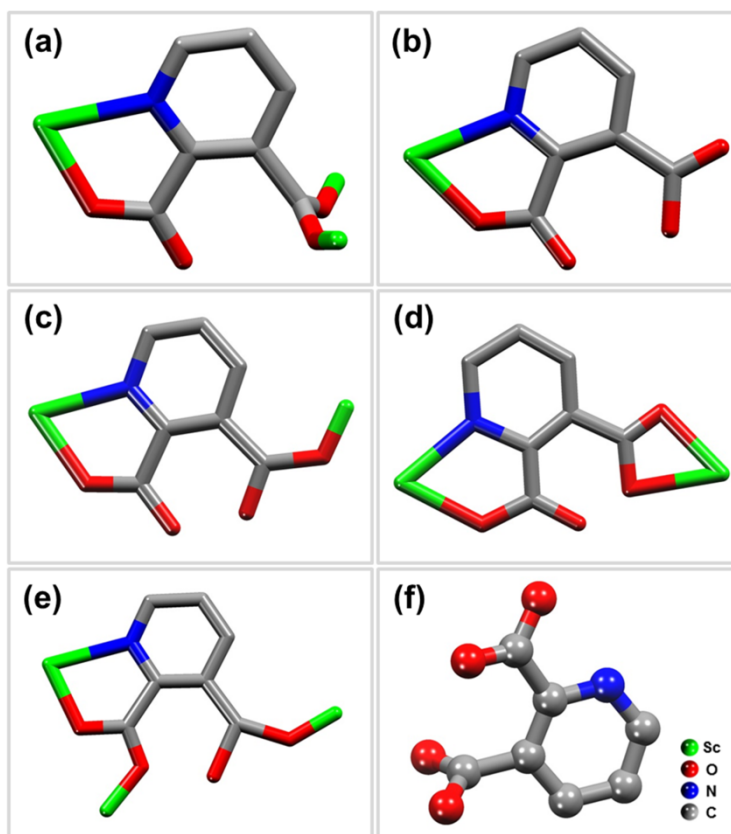

**Fig. S11** TGA curve for compound 1 and compound 2.

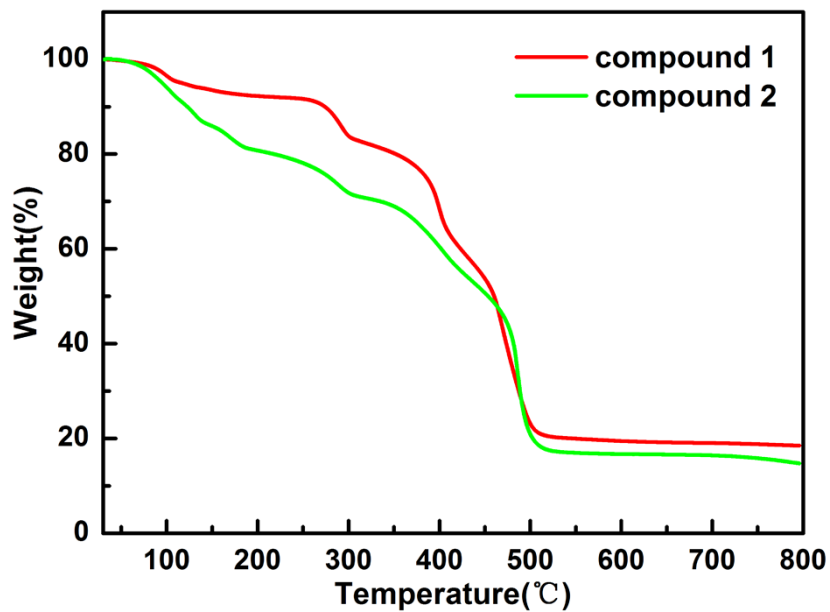

**Fig. S12** TGA curve for compound 3.

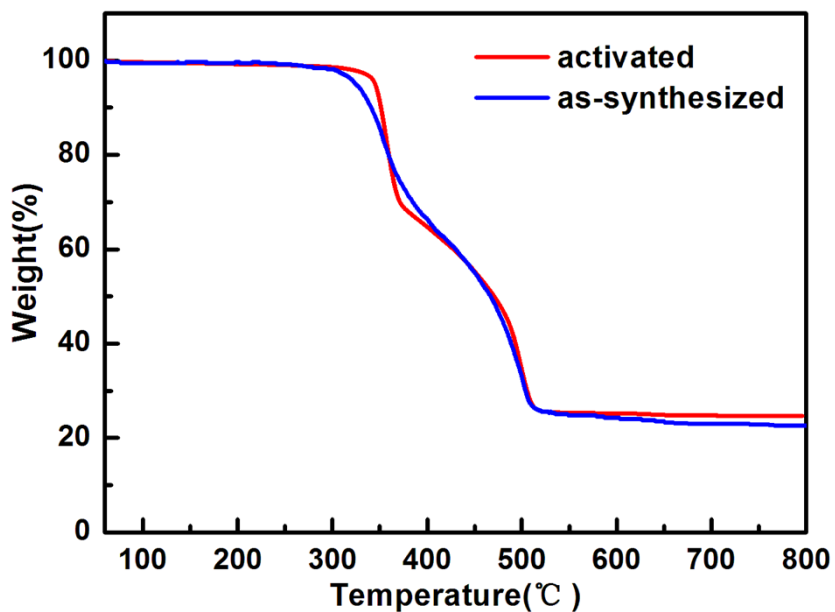

**Fig. S13** The variable-temperature powder XRD patterns of compound **3**.

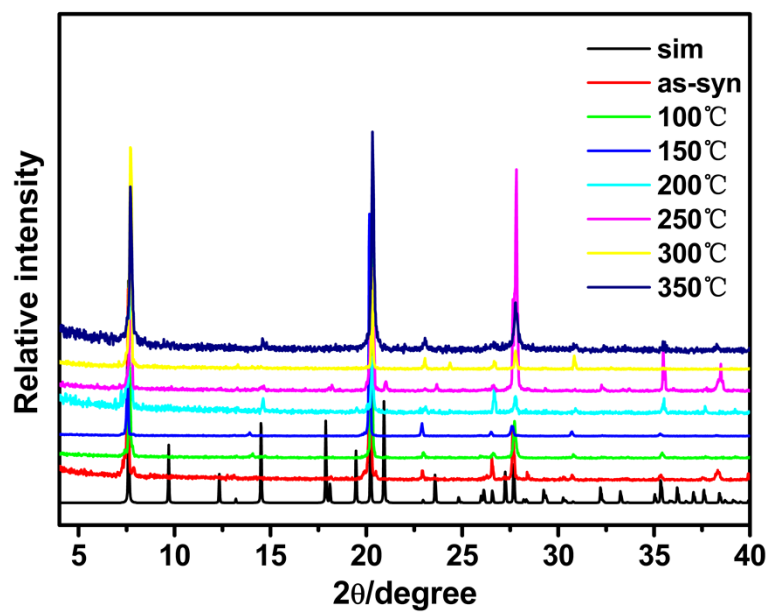



**Fig. S14**  $^1\text{H}$  NMR spectrum for the cyanosilylation of p-nitrobenzaldehyde.

$^1\text{H}$  NMR (300 MHz,  $\text{CD}_3\text{CN}$ )  $\delta = 8.21(\text{d}, J = 8.8 \text{ Hz}, 2\text{H}), 7.67(\text{d}, J = 8.8 \text{ Hz}, 2\text{H}), 5.80(\text{s}, 1\text{H}), 0.17(\text{s}, 9\text{H})$ .

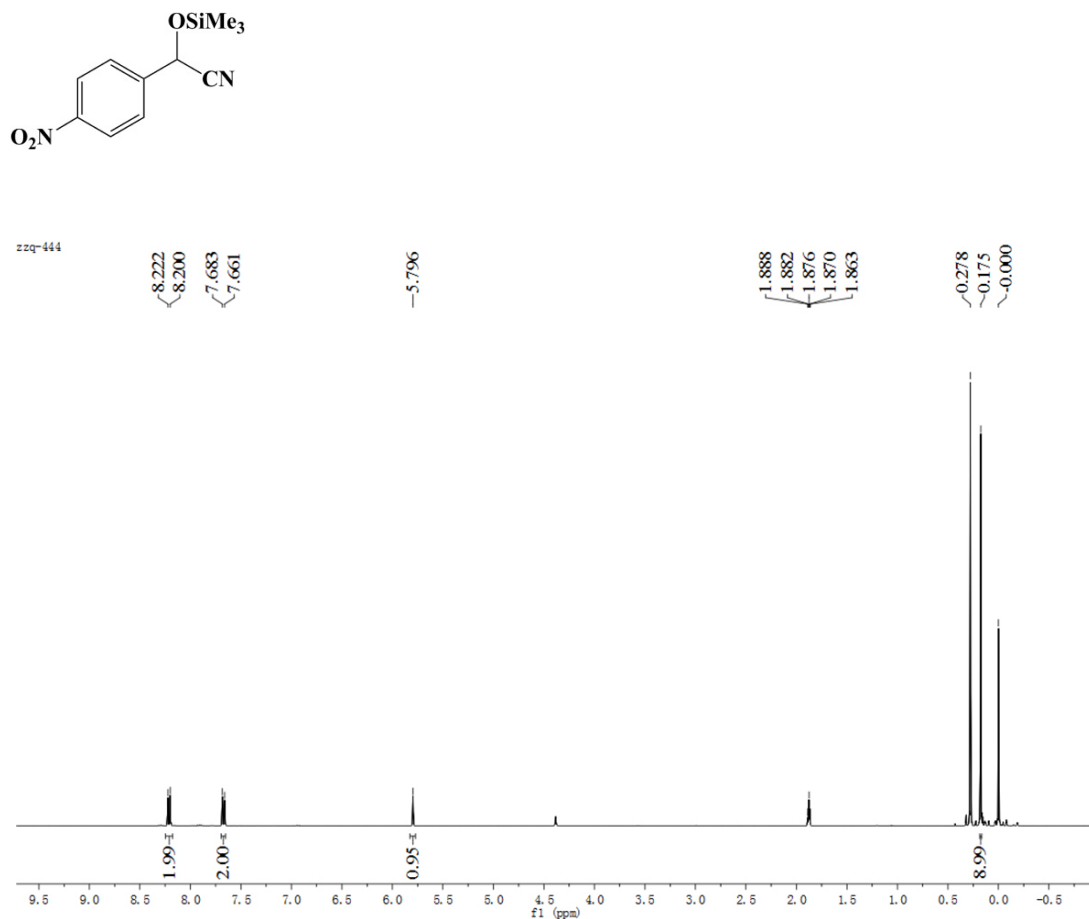



**Table S3.** Bond lengths [Å] and angles [°] for compound **2**.

|                    |            |                    |            |
|--------------------|------------|--------------------|------------|
| O(6)-Sc(2)#1       | 2.033(4)   | O(9)-Sc(2)         | 2.129(4)   |
| N(1)-Sc(2)         | 2.323(5)   | O(10)-Sc(1)        | 2.193(4)   |
| N(2)-Sc(1)         | 2.411(5)   | O(12)-Sc(2)        | 2.208(4)   |
| N(3)-Sc(1)         | 2.444(5)   | O(13)-Sc(2)        | 2.303(4)   |
| O(3)-Sc(1)#2       | 2.027(5)   | O(14)-Sc(1)        | 2.095(4)   |
| O(5)-Sc(1)         | 2.185(4)   | O(17)-Sc(1)        | 2.135(5)   |
| O(7)-Sc(2)         | 2.190(5)   | Sc(1)-O(3)#3       | 2.027(5)   |
| O(8)-Sc(2)         | 2.117(5)   | Sc(2)-O(6)#1       | 2.033(4)   |
| O(3)#3-Sc(1)-O(14) | 97.51(18)  | O(8)-Sc(2)-O(7)    | 91.2(2)    |
| O(3)#3-Sc(1)-O(17) | 172.52(19) | O(9)-Sc(2)-O(7)    | 80.42(17)  |
| O(14)-Sc(1)-O(17)  | 89.6(2)    | O(6)#1-Sc(2)-O(12) | 91.78(18)  |
| O(3)#3-Sc(1)-O(5)  | 86.63(18)  | O(8)-Sc(2)-O(12)   | 92.06(19)  |
| O(14)-Sc(1)-O(5)   | 143.16(17) | O(9)-Sc(2)-O(12)   | 144.58(17) |
| O(17)-Sc(1)-O(5)   | 86.3(2)    | O(7)-Sc(2)-O(12)   | 134.49(17) |
| O(3)#3-Sc(1)-O(10) | 90.15(17)  | O(6)#1-Sc(2)-O(13) | 95.12(17)  |
| O(14)-Sc(1)-O(10)  | 141.53(16) | O(8)-Sc(2)-O(13)   | 84.18(19)  |
| O(17)-Sc(1)-O(10)  | 85.59(18)  | O(9)-Sc(2)-O(13)   | 152.61(17) |
| O(5)-Sc(1)-O(10)   | 74.63(16)  | O(7)-Sc(2)-O(13)   | 78.18(18)  |
| O(3)#3-Sc(1)-N(2)  | 89.33(18)  | O(12)-Sc(2)-O(13)  | 57.08(17)  |
| O(14)-Sc(1)-N(2)   | 73.42(16)  | O(6)#1-Sc(2)-N(1)  | 87.48(18)  |
| O(17)-Sc(1)-N(2)   | 94.87(19)  | O(8)-Sc(2)-N(1)    | 96.68(19)  |
| O(5)-Sc(1)-N(2)    | 143.40(17) | O(9)-Sc(2)-N(1)    | 70.99(17)  |
| O(10)-Sc(1)-N(2)   | 69.02(15)  | O(7)-Sc(2)-N(1)    | 148.24(18) |
| O(3)#3-Sc(1)-N(3)  | 89.76(17)  | O(12)-Sc(2)-N(1)   | 76.08(17)  |
| O(14)-Sc(1)-N(3)   | 68.79(15)  | O(13)-Sc(2)-N(1)   | 133.12(18) |
| O(17)-Sc(1)-N(3)   | 90.76(18)  | O(6)#1-Sc(2)-C(21) | 91.23(18)  |
| O(5)-Sc(1)-N(3)    | 74.66(16)  | O(8)-Sc(2)-C(21)   | 90.53(19)  |
| O(10)-Sc(1)-N(3)   | 149.24(16) | O(9)-Sc(2)-C(21)   | 168.31(18) |
| N(2)-Sc(1)-N(3)    | 141.73(16) | O(7)-Sc(2)-C(21)   | 105.9(2)   |
| O(6)#1-Sc(2)-O(8)  | 174.9(2)   | O(12)-Sc(2)-C(21)  | 28.74(19)  |
| O(6)#1-Sc(2)-O(9)  | 99.34(17)  | O(13)-Sc(2)-C(21)  | 28.57(17)  |
| O(8)-Sc(2)-O(9)    | 79.36(17)  | N(1)-Sc(2)-C(21)   | 104.8(2)   |
| O(6)#1-Sc(2)-O(7)  | 83.71(18)  |                    |            |

Symmetry transformations used to generate equivalent atoms:

#1 -x+2, -y, -z+2    #2 x, -y+1/2, z-1/2    #3 x, -y+1/2, z+1/2

**Table S4.** Bond lengths [Å] and angles [°] for compound **3**.

|                     |            |                   |            |
|---------------------|------------|-------------------|------------|
| Sc(1)-O(3)#1        | 2.028(4)   | Sc(1)-O(6)        | 2.235(5)   |
| Sc(1)-O(8)          | 2.117(5)   | Sc(1)-O(5)        | 2.235(5)   |
| Sc(1)-O(2)#2        | 2.121(4)   | Sc(1)-N(1)        | 2.327(5)   |
| Sc(1)-O(1)          | 2.139(4)   |                   |            |
| O(3)#1-Sc(1)-O(8)   | 94.9(2)    | O(1)-Sc(1)-O(6)   | 150.01(18) |
| O(3)#1-Sc(1)-O(2)#2 | 176.0(2)   | O(3)#1-Sc(1)-O(5) | 87.3(2)    |
| O(8)-Sc(1)-O(2)#2   | 89.05(18)  | O(8)-Sc(1)-O(5)   | 76.6(2)    |
| O(3)#1-Sc(1)-O(1)   | 92.31(19)  | O(2)#2-Sc(1)-O(5) | 93.48(19)  |
| O(8)-Sc(1)-O(1)     | 76.65(19)  | O(1)-Sc(1)-O(5)   | 153.14(18) |
| O(2)#2-Sc(1)-O(1)   | 88.73(18)  | O(6)-Sc(1)-O(5)   | 56.85(18)  |
| O(3)#1-Sc(1)-O(6)   | 88.3(2)    | O(3)#1-Sc(1)-N(1) | 85.93(19)  |
| O(8)-Sc(1)-O(6)     | 133.2(2)   | O(8)-Sc(1)-N(1)   | 147.9(2)   |
| O(2)#2-Sc(1)-O(6)   | 88.87(19)  | O(2)#2-Sc(1)-N(1) | 90.78(18)  |
| O(1)-Sc(1)-N(1)     | 71.29(17)  | O(6)-Sc(1)-N(1)   | 78.86(18)  |
| O(5)-Sc(1)-N(1)     | 135.35(19) |                   |            |

Symmetry transformations used to generate equivalent atoms:

#1  $-x+2/3, -y+1/3, -z+1/3$     #2  $-y+1/3, x-y-1/3, z-1/3$

**Table S5.** Comparison of the three compounds with some other MOFs materials for cyanosilylation of *p*-nitrobenzaldehyde.

| MOFs Materials                                                                                | Time (h)    | Conversion (%) | Reference        |
|-----------------------------------------------------------------------------------------------|-------------|----------------|------------------|
| Ce-TTS                                                                                        | 1h          | >99%           | 1                |
| <b>Compound 2</b>                                                                             | <b>1.5h</b> | <b>99%</b>     | <b>This work</b> |
| Tb-PT1                                                                                        | 1.5h        | 90.5%          | 2                |
| MCM-Er                                                                                        | 2.5h        | 82%            | 3                |
| <b>Compound 3 (after activation)</b>                                                          | <b>5.5h</b> | <b>99%</b>     | <b>This work</b> |
| <b>Compound 1</b>                                                                             | <b>8h</b>   | <b>99%</b>     | <b>This work</b> |
| {[CdL <sub>2</sub> (DMF) <sub>2</sub> ](ClO <sub>4</sub> ) <sub>2</sub> ·(2DMF)} <sub>n</sub> | 14h         | 80%            | 4                |
| Tb-TCA                                                                                        | 4h          | 47%            | 5                |
| <b>Compound 3</b>                                                                             | <b>24h</b>  | <b>85.2%</b>   | <b>This work</b> |
| In(OH)(H <sub>2</sub> O)(1,4-bdc)                                                             | 94h         | 100%           | 6                |

### Reaction conditions

**This work:** Me<sub>3</sub>SiCN (1.2 mmol); *p*-nitrobenzaldehyde (0.5 mmol); catalysts, 0.05 mmol (10 mol %); room temperature;

**Reference 1:** Me<sub>3</sub>SiCN (0.20m); aldehyde (0.08m); Ce-TTS (1.6 mm) at room temperature under N<sub>2</sub> for 1 hour in 2 mL DMF/CHCl<sub>3</sub> (v/v=1:99) solution;

**Reference 2:** Me<sub>3</sub>SiCN (0.6 mmol); aldehyde (0.5 mmol); CH<sub>2</sub>Cl<sub>2</sub> (0.5 mL); Tb-PT1 or Sm-PT1 (0.005 mmol); 20 °C, 1.5 h;

**Reference 3:** 40 mg of MCM-Er in diethyl ether at room temperature;

**Reference 4:** Me<sub>3</sub>SiCN (2.64 mmol); aldehyde (1.32 mmol); DCM (10 mL); catalyst (5 wt%) is added at 0 °C ;

**Reference 5:** Me<sub>3</sub>SiCN (1.2 mmol); aldehyde (0.5 mmol); Tb-TCA catalysts, 0.01 mmol (2 mol%); room temperature under N<sub>2</sub> for 4 h;

**Reference 6:** Me<sub>3</sub>SiCN (1.2 mmol); p-nitrobenzaldehyde (0.5 mmol); catalysts, 0.05 mmol (10 mol %); room temperature.

## Reference

1. Jiao, Y.; Wang, J.; Wu, P.; Zhao, L.; He, C.; Zhang, J.; Duan, C., *Chem. Eur. J.* 2014, **20**, 2224.
2. Wu, X.; Lin, Z.; He, C.; Duan, C., *New J. Chem.* 2012, **36**, 161.
3. Procopio, A.; Das, G.; Nardi, M.; Oliverio, M.; Pasqua, L., *ChemSusChem.* 2008, **1**, 916.
4. Sharma, M. K.; Singh, P. P.; Bharadwaj, P. K., *Journal of Molecular Catalysis A-Chemical.* 2011, **342**, 6.
5. Wu, P.; Wang, J.; Li, Y.; He, C.; Xie, Z.; Duan, C., *Adv. Funct. Mater.* 2011, **21**, 2788.
6. Xia, J.; Zheng, J.; Xu, J.; Wang, L.; Yang, L.; Su, Z.; Fan, Y., *Inorg. Chim. Acta.* 2014, **411**, 35.
